# Supplementary material for: Updates and Comparative Analysis of the Mitochondrial Genomes of Paracoccidioides spp. Using Oxford Nanopore MinION Sequencing
Source: Front Microbiol. 2020 Aug 4;11:1751. doi: 10.3389/fmicb.2020.01751 (PMC7417371; doi:10.3389/fmicb.2020.01751)
Supplement: TABLE S1 — Primer sequences used to determine presence/absence of the insert. [file Table_1.XLSX]

## Sheet: Hoja1
Isolate ID	Origin	Source	Specie	Sequencing results			BWA results			Pilon Results						BioSample	SRA accession
				Number of paired end reads	Read length	Coverage	Mapped Reads to mit.	Coverage	minDepth	SNPs	Ambiguos bases	Small insertions	Inserted bases	Small delections	Deleted bases
Pbd02	Brazil	PCM	P. brasilienisis (S1a)	20835926	150	208.707	4255584	7523	752	922	49	197	821	218	950	SAMN05171531	SRS1612829
Pbd03	Brazil	PCM	P. brasilienisis (S1a)	14356949	150	143.809	4072519	7707	771	863	38	207	816	199	924	SAMN05171525	SRS1612808
Pbed01	Brazil	PCM	P. lutzii	12362993	150	123.836	7741	12	5	276	264	51	149	61	244	SAMN05171547	SRS1612805
Pbemp83	Colombia	Chronic PCM	P. restrepiensis (PS3)	16192432	150	162.195	4038715	7570	757	1225	45	256	1039	275	1181	SAMN05171535	SRS1612812
Pbbda_ms1	Brazil	PCM	P. brasilienisis (S1a)	16208469	150	162.355	3527651	6629	663	919	27	204	904	194	828	SAMN05171524	SRS1612822
Pbms2	Brazil	PCM	P. brasilienisis (S1a)	16484857	150	165.124	2865233	5450	545	935	44	207	884	192	806	SAMN05171526	SRS1612823
Pb01	Brazil	PCM	P. lutzii	54990094	101	370.885	967266	977	98	714	16	63	121	52	165	SAMN05171545	SRS1612858
Pb02	Venezuela	Chronic PCM	P. americana (PS2)	13706063	150	137.289	376881	665	67	1085	62	149	533	170	724	SAMN05171541	SRS1612807
Pb03	Brazil	Chronic PCM	P. americana (PS2)	62122554	101	418.99	5579261	6081	608	1565	73	197	578	250	944	SAMN05171542	SRS1612859
Pb113	Brazil	PCM	P. brasilienisis (S1b)	15515977	150	155.419	873811	1539	154	438	23	112	427	122	491	SAMN05171522	SRS1612813
Pb1445	Argentina	Chronic PCM	P. brasilienisis (S1a)	16165496	150	161.925	673634	1151	115	817	58	178	770	178	731	SAMN05171527	SRS1612809
Pb18	Brazil	Chronic PCMb	P. brasilienisis (S1b)	46805360	101	315.682	10881626	10869	1087	1	0	1	6	0	0	SAMN05171520	SRS1530159
Pb262	Brazil	Dog food	P. americana (PS2)	16818642	150	168.467	2059997	3843	384	1498	53	226	781	265	1212	SAMN05171543	SRS1612817
Pb300	Venezuela	Soil	P. venezuelensis (PS4)	15790507	150	158.169	138895	207	21	723	250	150	563	139	491	SAMN03787412	SRS1612825
Pb377	Brazil	D. novemcinctus	P. brasilienisis (S1a)	18837188	150	188.686	4366843	7705	771	928	26	198	853	214	927	SAMN05171528	SRS1612819
Pb339	Brazil	PCM	P. restrepiensis (PS3)	47914754	100	319.965	5441294	5999	600	911	36	158	513	171	735	SAMN05171536	SRS1612834
Pb60855	Colombia	Chronic PCM	P. restrepiensis (PS3)	43388073	100	289.737	4541609	5005	501	912	50	158	496	178	769	SAMN05171537	SRS1612831
Pb66	Brazil	PCM	P. brasilienisis (S1a)	15926012	150	159.526	5157366	9767	977	864	41	203	809	199	887	SAMN05171529	SRS1612811
Pbbac	Colombia	PCM	P. restrepiensis (PS3)	13868844	150	138.92	360701	523	52	981	181	198	745	201	824	SAMN05171538	SRS1612821
Pbbercelli	Argentina	PCM	P. brasilienisis (S1a)	15395408	150	154.211	962128	1701	170	889	43	196	848	189	796	SAMN05171530	SRS1612814
Pbblo	Brazil	PCM	P. brasilienisis (S1b)	15438687	150	154.645	3681305	6553	655	518	21	154	542	132	518	SAMN05171523	SRS1612826
Pbcab	Colombia	C. centralis	P. restrepiensis (PS3)	16867650	150	168.958	3239836	5638	564	1210	41	244	943	269	1215	SAMN05171539	SRS1612824
Pbcazon	Argentina	Acute PCM	P. brasilienisis (S1b)	17681543	150	177.111	4869019	9198	920	500	23	154	571	145	595	SAMN05171521	SRS1612818
Pbcnh	Colombia	Chronic PCM	P. restrepiensis (PS3)	12877761	150	128.993	1087249	1927	193	1040	52	229	870	210	880	SAMN03793109	SRS1612810
Pbjam	Colombia	Chronic PCM	P. restrepiensis (PS3)	42792851	100	285.762	7277869	7991	799	968	41	165	557	188	827	SAMN05171540	SRS1612830
Pb1578	Brazil	PCM	P. lutzii	6820384	150	68.3177	15403	19	5	472	241	68	294	87	303	SAMN05171546	SRS1612827
Pbee	Brazil	PCM	P. lutzii	17544879	150	175.742	157073	248	25	952	130	136	340	143	499	SAMN05171548	SRS1612820
Pbt10b1	Brazil	D. novemcinctus	P. americana (PS2)	15353965	150	153.796	468521	816	82	1473	108	220	688	271	1226	SAMN05171544	SRS1612828
Pbt15n1	Brazil	D. novemcinctus	P. brasilienisis (S1a)	14941749	150	149.667	3728209	7031	703	950	31	206	865	214	927	SAMN05171533	SRS1612804
Pbt16b1	Brazil	D. novemcinctus	P. brasilienisis (S1a)	16193615	150	162.206	3218764	6085	609	928	43	206	869	217	938	SAMN05171534	SRS1612815
Pbt1f1	Brazil	D. novemcinctus	P. brasilienisis (S1a)	19378424	150	194.108	1941040	3349	335	928	37	200	853	218	920	SAMN05171532	SRS1612816
Pb305	Venezuela	PCM	P. venezuelensis (PS4)	9722882	100	64.9219	1298098	1904	190	1098	53	238	899	201	878	unpublished	unpublished
Pb387	Venezuela	PCM	P. venezuelensis (PS4)	9922037	100	66.2517	2776556	4069	407	1198	67	255	959	224	916	unpublished	unpublished
Pb444	Venezuela	PCM	P. venezuelensis (PS4)	5773229	100	38.5492	914000	1340	134	1140	74	237	935	204	902	unpublished	unpublished
Mean	NA	NA	NA	2.10293e+07	NA	179.204	2.81829e+06	4326.21	432.912	906.242	68.8529	177.088	683.242	182.059	769.794	NA	NA
